# Supplementary material for: Combination therapy with potent PI3K and MAPK inhibitors overcomes adaptive kinome resistance to single agents in preclinical models of glioblastoma
Source: Oxford University Press journal article supplement (doi:10.1093/neuonc/nox044), 2017-03-01
Supplement: nox044_suppl_170117_mcneill_pi3k_and_mapk_table_s1.docx [file nox044_suppl_170117_mcneill_pi3k_and_mapk_table_s1.docx]

| **Class** | **Drug** | **Alternate name** | **Vendor(s)** | **Reference** |
| --- | --- | --- | --- | --- |
| PI3Ki | LY | LY294002 | Cayman Chemicals | 12 |
| Buparlisib | BKM120 | MedChem Express Chemietek | 13 |
| Dactolisib | BEZ235 | MedChem Express | 14 |
| MEKi | Selumetinib | AZD6244 | MedChem Express Chemietek | 15 |
| PD01 | PD0125901 | Cayman Chemicals | 16 |
| Trametinib | GSK1120212 | MedChem Express Selleckchem | 17 |
| mTORi | Temsirolimus | CCI-779 | Selleckchem | 18 |
| Everolimus | RAD001 | Selleckchem | 19 |

**Table S1. Drugs**
