# Supplementary material for: Combination therapy with potent PI3K and MAPK inhibitors overcomes adaptive kinome resistance to single agents in preclinical models of glioblastoma
Source: Oxford University Press journal article supplement (doi:10.1093/neuonc/nox044), 2017-03-01
Supplement: nox044_suppl_170117_mcneill_pi3k_and_mapk_table_s2.docx [file nox044_suppl_170117_mcneill_pi3k_and_mapk_table_s2.docx]

| **Treatment** | |  | **Orthotopic** |  | **Subcutaneous** |
| --- | --- | --- | --- | --- | --- |
| **PI3Ki** | **MEKi** |  | **Dose (mg/kg)** | | |
| Buparlisib |  |  | 30 |  | 30 |
| Dactolisib |  |  | NA |  | 50 |
|  | Selumetinib |  | 37 |  | 37 |
| Trametinib |  | NA |  | 1 |
| Buparlisib | Selumetinib |  | 25 + 18 |  | 25 + 18 |
| Trametinib |  | NA |  | 25 + 0.5 |
| Dactolisib | Selumetinib |  | NA |  | 25 + 18 |
| Trametinib |  | NA |  | 25 + 0.5 |
| **Schedule** | |  | 5 d on/2 d off continuous |  | qd x5 (d 14-18) |

**Table S2. Drug doses and schedules**
