# Supplementary material for: Combination therapy with potent PI3K and MAPK inhibitors overcomes adaptive kinome resistance to single agents in preclinical models of glioblastoma
Source: Oxford University Press journal article supplement (doi:10.1093/neuonc/nox044), 2017-03-01
Supplement: nox044_suppl_170117_mcneill_pi3k_and_mapk_table_s3.xlsx [file nox044_suppl_170117_mcneill_pi3k_and_mapk_table_s3.xlsx]

## Sheet: Table S3
Table S3. Summary of buparlisib-induced kinome changes
Kinase	4h	24h	48h
AURKA	1	0.510505	0.161436
PLK4	0.911075	0.987972	0.310629
CDK8	0.460225	0.528409	0.379289
ADCK1	0.820907	0.45805	0.42217
CDK18	0.882182	0.804678	0.430905
PLK1	1.16215	0.341632	0.442276
WEE1	0.967563	0.720879	0.474961
MET	0.880574	0.781535	0.487218
AKT1	0.432514	0.394457	0.505825
EPHA2	0.848066	0.598211	0.539138
AXL	0.883526	1.00854	0.539809
SIK1	0.990832	0.862979	0.549541
TTK	1.04316	0.799639	0.555263
ACVR1	0.894343	0.861534	0.591063
CDK1	1.00867	1.15113	0.598779
SIK2	1.02809	0.801271	0.611743
MARK3	0.998001	0.544334	0.61308
HCK	0.959101	1.02372	0.615984
RPS6KA4	0.934402	0.844182	0.62201
IGF1R	0.939035	1.30769	0.639923
CDK4	1.0846	0.973222	0.644511
DMPK	0.863885	0.869176	0.659763
TTN	0.946237	0.685488	0.660693
CDK17	0.96443	0.74321	0.665789
FRK	0.907476	0.886015	0.676302
BMPR1A	1.04219	0.959814	0.680817
BRAF	1.01602	0.924391	0.686273
EPHA4	0.882147	1.00996	0.698918
MELK	0.946755	0.808992	0.705278
MAK	0.954993	0.772681	0.711214
MARK2	0.769873	0.746114	0.718407
STK10	0.882954	1.00015	0.726186
CHEK1	1.02224	0.967231	0.731557
LATS1	0.965604	0.84937	0.732809
SIK3	0.828204	0.719463	0.754086
FLT4	1.00618	1.11699	0.763345
RIPK2	0.971947	0.981609	0.779919
IPMK	1.04773	1.11404	0.794511
MERTK	0.834967	1.03428	0.805591
STK35	0.878826	0.826919	0.807953
CDK6	0.854672	0.728662	0.81294
DCK	1.1513	1.05197	0.814717
TNK2	0.96615	0.790861	0.815537
PKN2	0.794328	0.847227	0.816582
STK4	0.954289	1.01406	0.820145
PRKCA	0.772072	0.75942	0.823137
GSK3B	0.867763	1.07213	0.823691
ABL2	1.11548	0.896325	0.832516
NEK2	0.954304	0.945567	0.83453
FGFR2	1.04754	1.03276	0.837932
CSK	0.977688	1.11327	0.840556
NUAK1	1.06355	0.888724	0.84554
PRKAA2	0.933709	0.823866	0.847461
PTK2B	1.01021	0.906717	0.857599
EPHB4	0.899408	0.865857	0.857666
CSNK1G2	1.07869	1.01596	0.864462
CLK3	1.2401	1.00971	0.864615
CDK10	1.26421	1.02844	0.865229
GSK3A	0.927838	1.10444	0.87003
SRPK1	1.05796	1.40164	0.873966
GAK	1.01656	0.823024	0.874842
CDC42BPB	1.09434	0.968815	0.87567
PRKD3	1.4662	1.2832	0.875855
MAP3K11	0.768594	0.946383	0.876221
PIP4K2A	0.883157	0.967691	0.878725
CSNK1D	1.20693	1.04146	0.879011
MAP2K6	1.67607	1.04575	0.883897
PKN1	0.937045	0.896469	0.892088
IRAK1	0.912245	0.96538	0.893557
SRC	0.990904	0.876313	0.893942
CDK2	1.07346	1.03608	0.896393
MAPK10	1.05201	0.840405	0.89733
EPHA5	0.982872	1.01051	0.899091
ACVR1B	1.15264	1.40436	0.903336
STK38L	0.805831	0.860701	0.903705
EIF2AK2	0.96627	1.02912	0.903872
PRKACA	0.92932	1.11728	0.90481
TAOK2	0.800547	0.750963	0.906511
TAOK1	0.870005	0.88203	0.908431
ABL1	1.03453	0.958107	0.909969
PASK	0.972747	1.14815	0.912011
PAK4	1.03965	1.11942	0.912583
BMPR2	1.04827	0.947105	0.914128
LIMK1	0.958423	1.12973	0.916901
MAP2K5	0.977479	0.890862	0.926897
MAP3K4	1.22462	0.981748	0.928966
ILK	1.23197	0.988886	0.932577
STK24	1.15349	1.09612	0.935666
MAPK11	1.05666	1.42137	0.935962
CLK2	1.20631	0.989054	0.937987
PIP4K2B	0.833187	0.930899	0.939158
MAP3K3	1.05049	1.03602	0.940767
BMP2K	1.08898	0.947356	0.943074
RIOK2	1.03505	0.852608	0.945206
CSNK1A1	1.32984	0.916415	0.94802
MLTK	0.986312	0.948971	0.948314
NUAK2	0.953301	0.897645	0.949396
ROCK2	0.963829	0.990832	0.954993
CSNK1E	1.27121	1.01509	0.957298
DDR1	1.10461	1.08615	0.959492
FGFR1	1.06739	0.959163	0.962949
RPS6KA6	1.00925	0.816582	0.963829
PKM	0.847227	1.08643	0.972747
MAP4K5	0.870964	0.77983	0.972747
RPS6KA5	1.01782	0.910751	0.974105
CDK7	1.37918	1.06453	0.976901
PSKH1	0.895365	1	0.981748
MINK1	0.975403	0.900181	0.984304
CSNK1G3	1.05358	0.964106	0.984896
PTK2	1.04535	0.843601	0.985936
TLK2	0.893895	1.02824	0.987566
AURKB	1.10424	0.947821	0.9913
MAP4K4	0.964546	0.930939	0.996776
PRKD2	1.08622	0.992477	1.00098
PHKG2	1.06945	1.1274	1.00415
CDK9	1.0564	1.03318	1.00465
TBK1	1.00479	0.899838	1.00885
RPS6KB1	0.9197	0.904891	1.01011
STK38	1.02866	0.963289	1.01199
PRKD1	0.999015	0.874877	1.01416
MAPK8	1.03044	0.891587	1.01524
TGFBR2	0.919227	1.26143	1.01772
PRKAA1	1.0144	0.852874	1.02181
MAP2K4	0.852832	1.01523	1.02253
MAPK14	1.07953	1.20861	1.02584
CDK14	0.997072	0.829877	1.02619
CDK12	1.00742	1.15677	1.03201
MAP2K1	0.983837	1.11974	1.03344
MAP2K2	0.830713	1.00418	1.03671
TYRO3	0.933477	1.0988	1.0431
NEK1	1.11458	0.97688	1.04468
EGFR	1.26033	1.01657	1.05374
YES1	1.02872	1.08933	1.05792
SRPK2	1.16611	1.16738	1.05945
KSR1	1.16693	0.99657	1.06845
MAP3K2	1.11573	0.99692	1.07765
ULK3	1.11951	0.95807	1.07883
AAK1	1.08775	1.03142	1.07886
PIK3C3	0.873	0.949885	1.08179
ADK	0.883797	1.03524	1.08234
STK16	0.959295	1.11303	1.08463
DYRK1A	0.920514	1.01397	1.10312
STRADA	1.11132	1.10063	1.10315
MAP2K3	1.21251	1.34943	1.10563
TNIK	0.870964	0.937562	1.10662
CDK16	1.07328	1.09898	1.12132
EPHB2	1.05047	0.87795	1.12427
TGFBR1	1.38836	1.24164	1.12676
DAPK3	0.911913	0.938367	1.13537
JAK1	0.980631	0.935744	1.14034
CAMK2A	1.00064	0.977136	1.14849
FER	1.02684	0.957278	1.15474
CSNK1G1	1.07403	1.19748	1.17469
CDK19	0.722697	0.800634	1.1748
TLK1	1.04713	1.13763	1.18032
LYN	1.05712	1.06759	1.18395
RPS6KA1	1.06646	1.03557	1.19092
MAPK6	0.928966	1.11686	1.19124
EPHB3	1.12902	1.21702	1.19748
IRAK4	1.05059	1.21981	1.20027
STK11	1.01737	0.968055	1.20634
SYK	1.24738	1.08643	1.21339
SLK	0.935399	1.36656	1.23077
CHUK	1.21032	1.39221	1.23411
PDPK1	1.08098	1.07829	1.288
PRKACB	1.05311	1.1785	1.29012
FN3KRP	1.00872	1.24182	1.29437
CLK4	1.80108	1.17192	1.29837
CDK20	1.00925	1.30617	1.31826
TK2	0.737281	1.01298	1.3662
MTOR	0.895365	0.772681	1.36773
STK3	1.15807	1.34353	1.37426
MAPK9	1.0613	1.23116	1.38836
CSNK2A1	1.17664	1.48895	1.39818
CAMK1	0.787046	1.45881	1.40605
CAMKK2	0.012706	2.12814	1.45881
RPS6KA3	1.06042	0.944708	1.54623
MAPK1	1.13782	1.24059	1.59331
NME4	0.85725	1.19845	1.61531
DDR2	1.2957	1.58789	1.65609
CHKB	1.14374	1.07863	1.67382
CAMK2G	0.995858	1.45279	1.68997
TAOK3	1.41906	1.19124	1.72187
INSR	1.20232	1.7331	1.78183
MAPK3	1.16211	1.60266	1.88309
CAMK2D	1.03608	1.22459	1.90592
CDK5	1.32394	1.71984	1.98451
IKBKB	1.07987	1.36453	2.06911
CAMK2B	1.29529	1.7675	2.10882
CSNK2A2	1.39601	1.33277	2.1354
PRKG1	0.83946	1	2.22844
PDXK	1.11074	1.66688	2.35452
NEK9	1.47854	1.4935	2.46141
PIP4K2C	1.25893	0.870964	2.65461
TP53RK	1.53433	1.46011	2.90348
CHKA	1.25294	0.866563	4.18602
FYN	1.69616	2.78482	4.44623
