# Supplementary material for: Combination therapy with potent PI3K and MAPK inhibitors overcomes adaptive kinome resistance to single agents in preclinical models of glioblastoma
Source: Oxford University Press journal article supplement (doi:10.1093/neuonc/nox044), 2017-03-01
Supplement: nox044_suppl_170117_mcneill_pi3k_and_mapk_table_s4_kinome_data.xlsx [file nox044_suppl_170117_mcneill_pi3k_and_mapk_table_s4_kinome_data.xlsx]

## Sheet: Table S4
Table S3. Summary of PDX kinome profiles
GBM59				GBM46				GBM12				GBM6
≥2	2-0.4	≤0.4		≥2	2-0.4	≤0.4		≥2	2-0.4	≤0.4		≥2	2-0.4	≤0.4
JNK3	NEK9	MSK1		FMS	EphA4	CDK7		skMLCK	FGFR1	smMLCK		RET	CLIK1	CDK4
PKCt	LRRK2	RSK1		IRAK3	GCK	MET		PDGFRa	PRPK	NuaK2		skMLCK	TIE2	MSK1
EGFR	PKG1	AurA		PKCb	ICK	PKCd		IRAK3	ATM	AMPKa2		CaMK2b	IRAK4	smMLCK
ADCK4	CaMK2a	MST3		LCK	CDK6	DLK		CaMK2a	TYRO3	RIOK2		JNK3	DRAK2	PKCd
CaMK2d	CK1g2	SRC		SYK	PFTAIRE1	CDK4		MER	QSK	RSK1		IRAK3	CaMK1d	AurA
IRAK3	STLK6	INSR		BTK	STLK6	NuaK2		SYK	PKD1	DDR2		PKG1	PRPK	ALK2
NEK7	PFTAIRE1	IGF1R		JNK3	PIK3R4	AurA		CaMK2b	LRRK2	PKCd		FLT4	QSK	CDK7
EphA1	PKCb	YANK2		ADCK4	Erk2			BTK	DNAPK	LIMK2		PHKg1	EphA4	RSK1
FMS	BCKDK			PKG1	ADCK1			TTN	GCK	AXL		PKCa	LKB1	NuaK2
FYN	CLIK1			FGR	CLK2			PKCb	YES	MET		FYN	NDR2	RIOK2
TIE2	CLK2			CaMK2a	PDGFRa			MARK1	PKACb	CaMKK2		ADCK4	ATM	EphB2
PIK3R4	PHKg1			HCK	Erk1			FMS	CK1e			BTK	CK1g2	AXL
BTK	MAP2K6			NEK7	PKD1			RSK2	PIK3R4			FES	STK33	MET
ADCK1	RSK3			CLIK1	BCKDK			PKG1	CDC2			FMS	YES
FES	IRAK1			BLK	NEK11			FYN	CLK2			CaMK2a	CDK6
GCK	YES			CaMK2d	TAO3			HCK	NDR2			SYK	BMPR2
SYK	CK1g1			FES	IRAK4			PKCa	ABL			EGFR	Wee1
LIMK1	CK2a1			FRK	PEK			FLT4	CaMK2d			CaMK2d	MAP3K5
DRAK1	NEK11			DMPK1	QSK			FGFR2	MAP3K4			PKD1	FGR
PKD1	DRAK2			FYN	LIMK1			PEK	CK1g2			LRRK2	HCK
	MARK1			skMLCK	LKB1			PHKg1	BMPR2			NEK11	CHK2
	STK33			PKCa	FGFR2			FES	KHS2			FGFR2	IKKb
	PKR			PHKg1	CK1g2			CASK	PFTAIRE1			Erk2	STLK5
	HCK			FLT4	CaMK1a			STK33	ADCK4			AKT2	MAP2K6
	KHS1			LYN	TYRO3			CLIK1	BLK			PKCb	p38b
	CHK2			CaMK1d	p38b			BMPR1A	PKACa			DDR1	ADCK1
	EphB4			TRKB	RSK2			Wee1	LKB1			NEK7	JAK1
	CaMK2g			EGFR	CaMK2b			DDR1	MLK2			PEK	LYN
	Erk1			NDR2	NEK9				TAO3			PIK3R4	RSK2
	IRAK4			DDR1	MARK1				KHS1			MARK1	PKR
	NuaK1				TAO1				NEK3				TAO3
	FLT4				MAP2K6				SLK				PFTAIRE1
	CASK				Erk5				IRE1				NEK9
	FGR				STK33				MST1				MAP2K2
	LKB1				BMPR2				NuaK1				CK2a1
	MAP3K4				DRAK1				QIK				GCK
	STLK5				LRRK2				AKT1				FAK
	PDK1				MAP3K1				MAP2K6				DNAPK
	TAO3				Wee1				TAO1				MAP3K6
	PEK				PKCt				DYRK1A				CASK
	p38b				TEC				STLK5				FER
	ICK				STLK5				TRKB				PDGFRa
	IRE1				DAPK2				PKCt				CLK2
	AKT1				PDGFRb				AKT2				STLK6
	CaMK1d				ATM				ZC2/TNIK				BIKE
	Erk2				MAP2K2				Erk2				CDK2
	BMPR2				MER				LATS1				MER
	Wee1				KHS2				TIE2				PKN1
	JAK1				CASK				CK1g1				TAO1
	ATM				KHS1				MARK4				GSK3A
	PKN1				TIE2				DAPK2				SRPK2
	GCN2				FAK				TIF1b				TLK1
	QSK				PKCe				YANK2				NEK3
	PHKg2				BIKE				CSK				GSK3B
	SRPK2				RET				CDK2				ABL
	MAP2K3				PRPK				BIKE				BLK
	TAO2				IRE1				PKCe				PKD2
	MAP3K5				TESK1				CHK1				ICK
	EphA4				EphB3				SRPK2				LCK
	DDR1				PASK				TAO2				RIPK1
	RIPK1				SRPK2				MAP3K1				PKD3
	PRPK				CK2a1				ILK				BRAF
	CK2a2				MAP2K4				GSK3B				MLK2
	NDR2				ILK				SgK496				PKCt
	BLK				BMPR1B				FAK				EphB3
	TEC				YES				FGR				BCKDK
	EphA3				AKT2				HRI				BMPR1B
	MAP2K5				MARK4				BCKDK				LIMK1
	DAPK2				HRI				MAP2K4				MAP2K5
	ILK				CHK1				JNK3				TRKB
	TAO1				PDK1				PDGFRb				MAP3K1
	PASK				FER				MAP2K5				Erk1
	CDK5				TAO2				MARK2				DAPK2
	PKCe				IRAK1				p38b				CK2a2
	MARK3				NDR1				CDK10				PCTAIRE2
	DMPK1				p38a				MAP2K2				RSK3
	MAP3K7				RIPK1				LYN				TAO2
	PKD2				BRAF				ROCK1				FGFR1
	CaMK2b				AKT1				TYK2				IRAK1
	TRKB				RSK3				ZC1/HGK				DYRK1A
	TESK1				MLK2				CDK11				PASK
	FRK				MAPKAPK2				CHK2				MAP3K4
	BRAF				TIF1b				MST2				CK1e
	p38a				DYRK1A				CDK6				ILK
	CLIK1L				PCTAIRE2				RIPK1				TIF1b
	FER				ABL				CLK1				YANK2
	RIPK2				MAP2K5				Erk5				FRK
	MER				PKACa				TESK1				ULK3
	HRI				QIK				CRK7				PKCe
	PKACa				PKR				TEC				Erk5
	PKN2				PKN1				NEK7				FRAP
	PDGFRa				CHK2				IRAK1				ZC1/HGK
	MRCKb				CK2a2				TLK1				KHS2
	CDK6				MAP3K5				YSK1				YSK1
	TYRO3				FGFR1				GSK3A				HRI
	CaMKK2				PHKg2				IGF1R				ROCK1
	PKACb				MAP3K7				JAK1				TYK2
	ZC2/TNIK				CDK5				NEK9				ROCK2
	TBK1				ROCK1				AurB				TEC
	GSK3A				RSK1				ADCK1				CDK5
	MARK4				CDKL5				CaMK1d				TYRO3
	MAP3K6				CK1e				PKD3				TESK1
	PCTAIRE3				PKN2				CK2a1				AKT1
	TIF1b				YSK1				EGFR				LATS1
	TYK2				MAP2K3				NDR1				MAP2K1
	CDK2				PYK2				PASK				NDR1
	AMPKa2				KDR				STLK6				PDK1
	BIKE				GSK3B				ULK3				MARK4
	MET				MRCKb				CLIK1L				p70S6K
	Erk5				MAP3K6				IKKb				MAP2K4
	MYT1				IKKb				FRAP				QIK
	MST1				NEK3				PCTAIRE2				CDK11
	AKT2				PKACb				DRAK1				CaMKK2
	YSK1				MST1				CK1a				DMPK1
	AAK1				TGFbR1				PKD2				CK1a
	skMLCK				CDK11				ARG				ZC2/TNIK
	PKD3				CDK2				p38a				PKACa
	MAP2K4				NuaK1				LCK				BUB1
	CK1a				MST2				FRK				SgK496
	TLK1				MAP2K1				MARK3				CDC2
	RSK2				CaMK2g				TGFbR1				CK1g3
	CK1e				p70S6K				BUB1				PHKg2
	MLK2				PKD2				Erk1				PKN2
	SgK496				CaMKK2				MAPKAPK2				CHK1
	RET				EphB4				CaMK2g				AMPKa1
	DYRK1A				CK1a				EphA5				PCTAIRE3
	GSK3B				HIPK2				CaMK4				MARK3
	PKCa				CHED				PKN2				IRE1
	MAP2K1				GSK3A				MAP2K3				EphA1
	HIPK2				TGFbR2				EphB2				CK1g1
	CaMK1a				CK1g1				PDK1				RIPK2
	NDR1				JAK1				HIPK2				p38a
	JNK2				DNAPK				MRCKb				MRCKb
	ROCK1				CSK				RSK3				PKACb
	MAP2K2				ZC1/HGK				PKN3				CaMK2g
	QIK				NEK1				EphB4				DRAK1
	MAP3K1				DDR2				CaMK1a				EphB4
	LYN				PKD3				JNK1				PKN3
	FGFR2				ZC2/TNIK				IRAK4				CSK
	PCTAIRE2				EphA1				PKN1				TBK1
	ABL				CK1g3				TLK2				JNK2
	MARK2				AKT3				PAK4				MST2
	KHS2				MAP3K4				CK1g3				NEK1
	PLK1				LATS1				RET				GAK
	SLK				MAP3K2				PLK1				PAK4
	AMPKa1				MPSK1				FER				PDGFRb
	MAP3K2				MARK2				PHKg2				MST1
	NEK3				JNK2				MAP3K3				KHS1
	NEK1				MARK3				MAP3K7				HIPK2
	MPSK1				CaMK4				LIMK1				AKT3
	NEK2				CRK7				BRAF				CHED
	CDC2				SgK496				MAP3K6				TTK
	BMPR1A				CLK1				TTK				PYK2
	AKT3				ACK				MELK				MARK2
	TLK2				TYK2				MAP2K1				MAP2K3
	CDKL5				FRAP				AurA				MAP3K2
	MST2				TLK2				NEK11				EphA5
	CLK1				ROCK2				CHED				ZC3/MINK
	CHK1				PAK4				PYK2				TTN
	CLK3				ULK3				EphB3				AMPKa2
	IKKb				CLIK1L				MAP3K2				ARG
	ROCK2				TLK1				ACK				MPSK1
	DDR2				LIMK2				CK2a2				NEK2
	PCTAIRE1				ZC3/MINK				PKR				NuaK1
	CHED				TBK1				TGFbR2				AurB
	p70S6K				GAK				JNK2				PCTAIRE1
	CDK8				AMPKa2				RIPK2				BMPR1A
	KDR				SRC				ROCK2				CLK3
	CK1g3				AMPKa1				NEK2				KDR
	IKKa				BMPR1A				ZAK				IGF1R
	TTK				TTK				ZC3/MINK				ZAK
	FRAP				TTN				p70S6K				CaMK1a
	ZC3/MINK				PLK1				CDKL5				MAPKAPK2
	DNAPK				MYT1				MLK3				AAK1
	FGFR1				CDK8				TBK1				CDK9
	TGFbR2				GCN2				AKT3				TLK2
	LATS1				CDK9				CLK3				TGFbR2
	MELK				RIPK2				GCN2				CaMK4
	IKKe				MAP3K3				ICK				MAP3K7
	PAK4				DRAK2				DRAK2				CDK10
	FAK				ARG				CK1d				PLK1
	ACK				AAK1				CDK5				MLK3
	CRK7				EphA5				AMPKa1				DDR2
	CDK10				AurB				MYT1				CLIK1L
	PKCd				CDC2				CDK9				MYT1
	LCK				CDK10				PLK4				CLK1
	EphA5				PCTAIRE1				EphA1				CDK8
	ZC1/HGK				IKKe				DMPK1				MELK
	ARG				EphB2				BMPR1B				LIMK2
	BUB1				PCTAIRE3				NEK1				SRPK1
	GAK				PLK4				AAK1				PLK4
	CDK9				CLK3				MAP3K5				CRK7
	MSK2				MLK3				EphA4				DLK
	MAPKAPK2				EphA3				IKKa				TGFbR1
	JNK1				NEK2				LOK				MAP3K3
	AurB				LOK				PCTAIRE1				GCN2
	PLK4				ZAK				SRPK1				CK1d
	PKN3				PKN3				DAPK3				IKKe
	RIOK2				JNK1				MPSK1				IKKa
	BMPR1B				SLK				GAK				JNK1
	TGFbR1				IGF1R				CDK7				SLK
	ZAK				DAPK3				MSK2				ACK
	CK1d				INSR				DLK				DAPK3
	CaMK4				ALK2				IKKe				CDKL5
	EphB3				IKKa				EphA3				INSR
	PDGFRb				AXL				SRC				LOK
	MAP3K3				SRPK1				CDK8				EphA3
	TTN				BUB1				KDR				MSK2
	DAPK3				MSK1				MST3				SRC
	EphB2				MELK				PCTAIRE3				MST3
	PYK2				CK1d				MSK1
	SRPK1				RIOK2				ALK2
	LIMK2				smMLCK				CDK4
	smMLCK				MST3				INSR
	ULK3				YANK2
	CSK				MSK2
	CDK11
	DLK
	ALK2
	LOK
	AXL
	CDK4
	NuaK2
	MLK3
	CDK7
